# Supplementary material for: Work-Related Psychosocial Demands and Resources in General Practice Teams in Germany. A Team-Based Ethnography
Source: MDPI journal article supplement (doi:10.3390/ijerph17197114), 2020-09-28
Supplement: s1 [file s1]

## **Supplementary file 1: IMPROVEjob-Consortium**

### **Current institutions and members:**

*Institute of Occupational and Social Medicine and Health Services Research, University Hospital Tuebingen, Germany: MA Rieger, E Rind, A Siegel, A Wagner, E Tsarouha*

*Department of Psychosomatic Medicine and Psychotherapy, Medical University Hospital Tuebingen, Germany: F Junne, T Seifried-Dübon, F Stuber, A Herrmann-Werner, S Zipfel*

*Institute of General Practice and Family Medicine, University Hospital Bonn, Germany: B Weltermann, S Kasten, K Linden, L Degen*

*Operations Research, Ruhr-University Bochum, Germany: B Werners, M Grot*

*Institute for Medical Informatics, Biometry and Epidemiology & Center for Clinical Studies, University of Duisburg-Essen, Germany: K-H Jöckel, C Pieper, V Schröder, J-M Bois, A-L Eilerts, M Brinkmann*

### **Former institutions and members:**

*Institute for General Medicine, University Hospital Essen, Germany: C Kersting*

*Institute of Occupational and Social Medicine and Health Services Research, University Hospital Tuebingen, Germany: S Hartmann (née Emerich), S Burgess, M Hippler*

*Institute of General Practice and Family Medicine, University Hospital Bonn, Germany: A Dreher*

*Institute for Medical Informatics, Biometry and Epidemiology & Centre for Clinical Trials, University of Duisburg-Essen, Germany: C Ose*

*Operations Research, Ruhr-University Bochum, Germany: L Imhoff (née Koppka), J Block*
